# Supplementary material for: Pyrroloindacenodithiophene polymers: the effect of molecular structure on OFET performance
Source: Royal Society of Chemistry journal article supplement (doi:10.1039/c3py00335c), 2013-01-01
Supplement: c3py00335c.pdf [file c3py00335c.pdf]

## **Pyrroloindacenodithiophene Polymers: The Effect of Molecular Structure on OFET Performance**

Jenny E. Donaghey,<sup>\*a</sup> Eun-Ho Sohn,<sup>a, b</sup> Raja Shahid Ashraf,<sup>a</sup> Thomas D. Anthopoulos,<sup>c</sup> Scott E. Watkins,<sup>d</sup> Kigook Song,<sup>e</sup> Charlotte K. Williams,<sup>a</sup> Iain McCulloch<sup>a</sup>

<sup>a</sup>*Department of Chemistry and Centre for Plastic Electronics, Imperial College London, London SW7 2AZ, UK.  
E-mail: jenny.donaghey@imperial.ac.uk.*

<sup>b</sup>*Interface Materials and Engineering Laboratory, Korea Research Institute of Chemical Technology, Daejeon 305-343, Republic of Korea*

<sup>c</sup>*Department of Physics and Centre for Plastic Electronics, Imperial College London, London SW7 2AZ, UK*

<sup>d</sup>*CSIRO Materials Science and Engineering, VIC 3169, Victoria, Australia*

<sup>e</sup>*Materials Research Center for Information Display, Kyung Hee University, Yongin, Gyeonggi-do 446-701, Republic of Korea*

### **Supporting Information**

DSC data

Energy level DFT calculations

Transistor output curves

## DSC Data

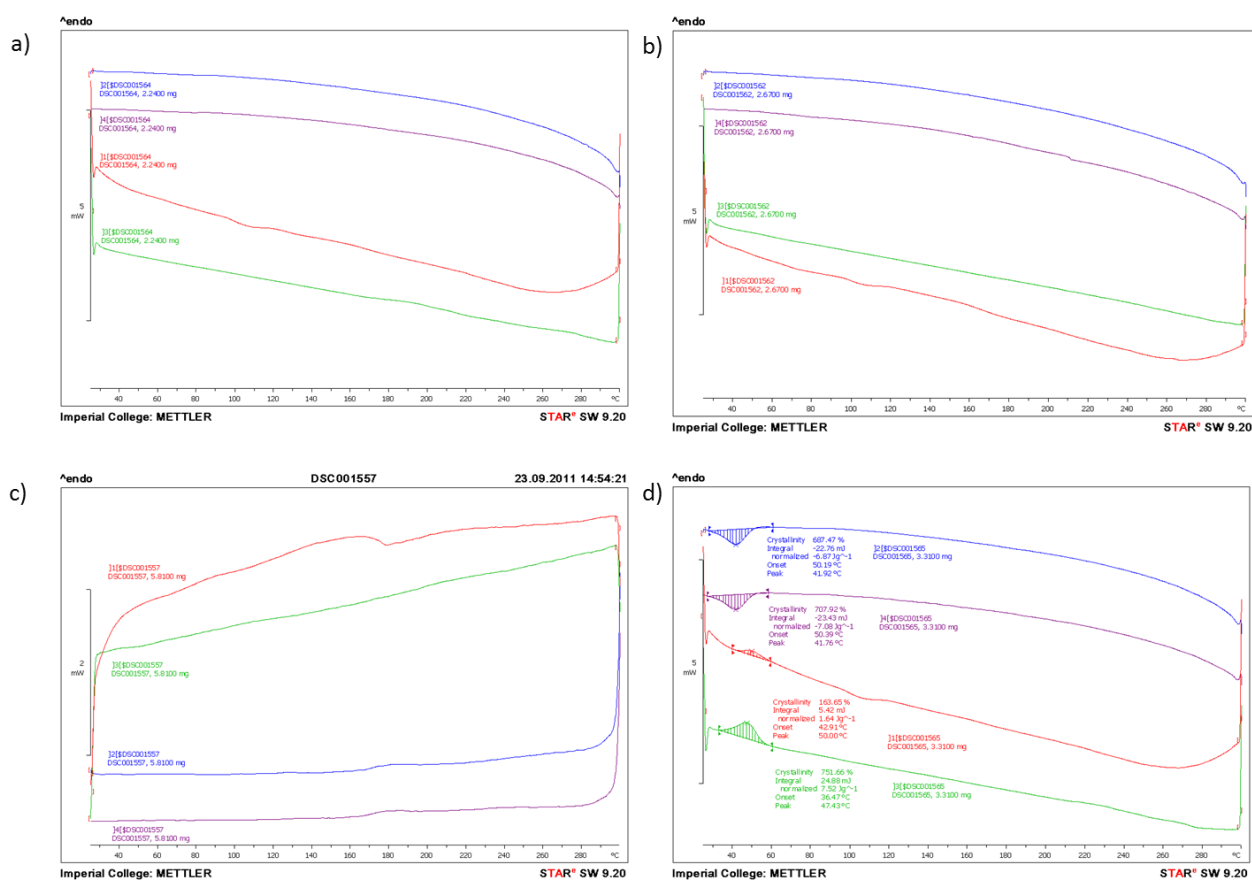

**Figure S1** DSC of a) NIDT-T, b) NIDT-TT, c) NIDT-TPD and b) NIDT-DPP from 25-300 °C

## Density Functional Theory Energy Level Calculations

a) NIDT-T

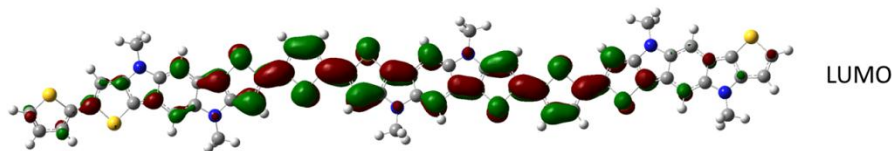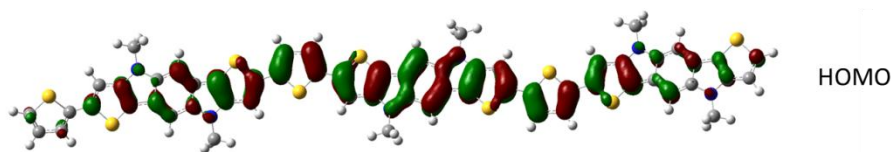

b) NIDT-TT

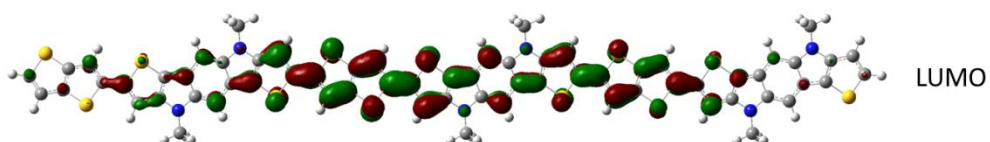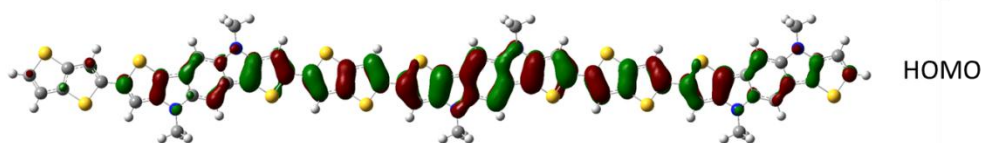

c) NIDT-TPD

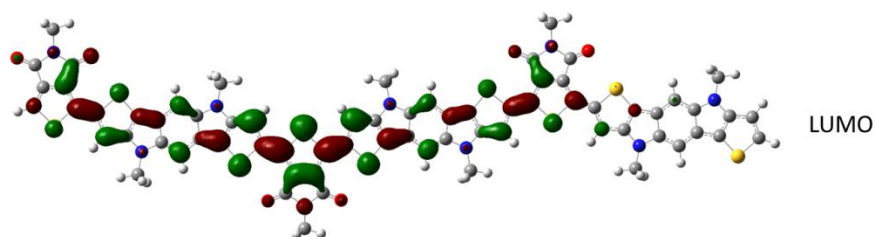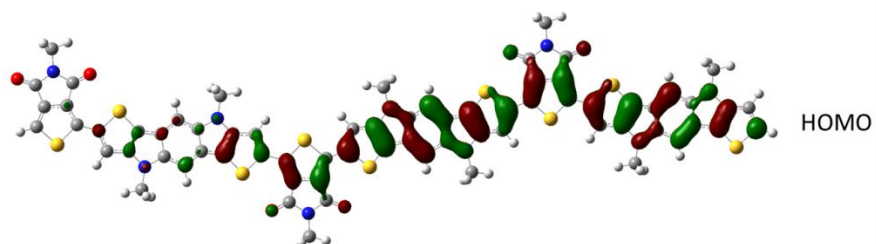

d) NIDT-DPP

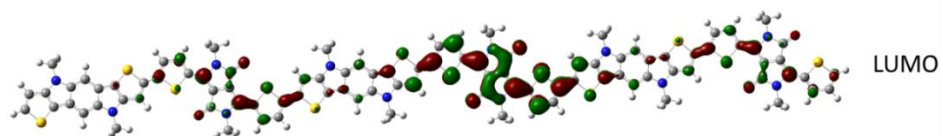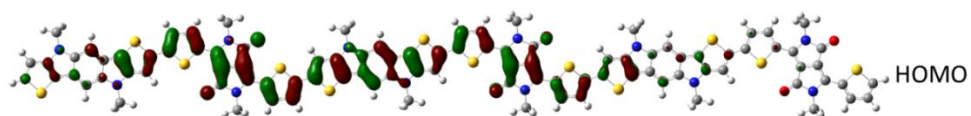

## Transistor Output Curves

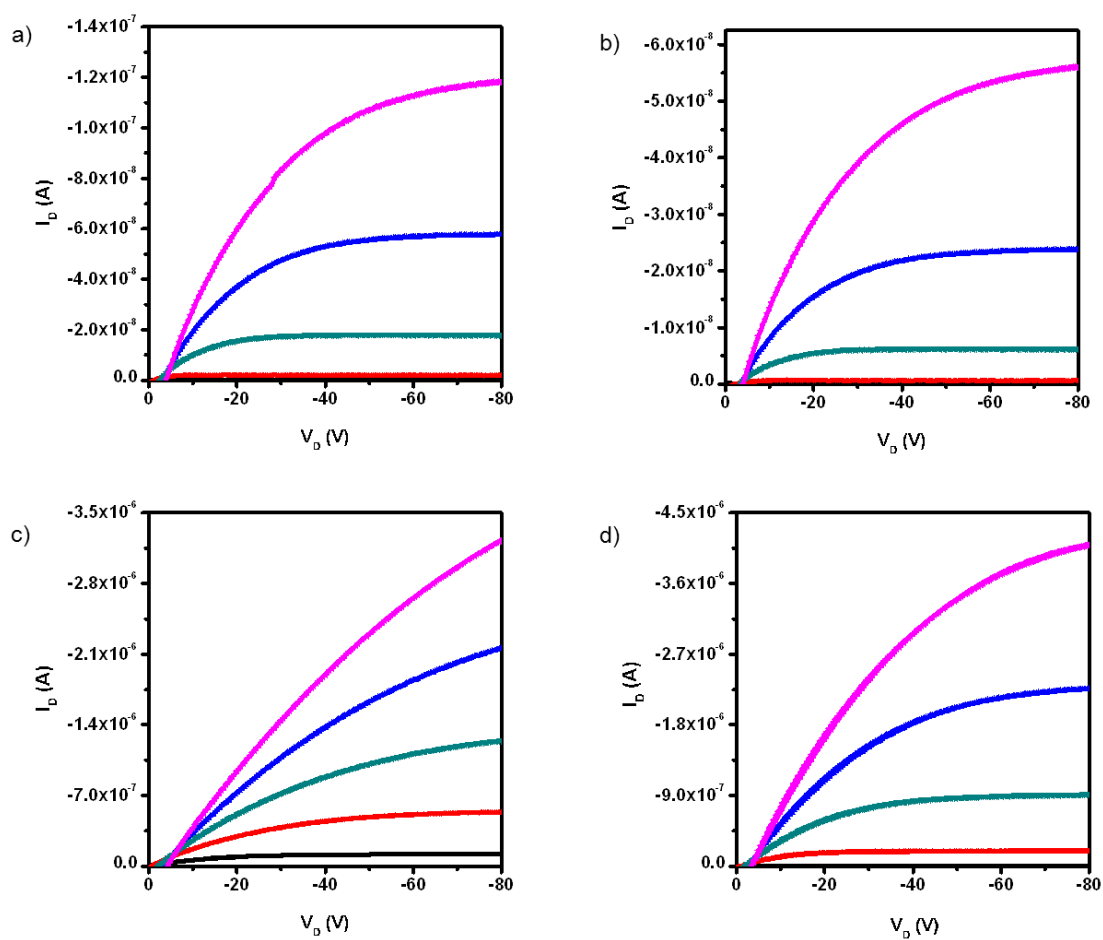

**Figure S2** OFET output curves for a) NIDT-T, b) NIDT-TT, c) NIDT-TPD and d) NIDT-DPP
